# Supplementary material
Source: HighWire-hosted journal article supplement (https://erj.ersjournals.com/content/58/1/2100041)
Supplement: inline-supplementary-material-1 [file inline-supplementary-material-1.pdf]

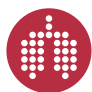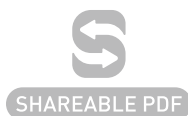

# *Pseudomonas aeruginosa* and chronic lung allograft dysfunction: does evading an iceberg prevent the ship from sinking?

Robin Vos <sup>1,2</sup> and Anke Van Herck<sup>1</sup>

<sup>1</sup>Dept of Respiratory Diseases, University Hospitals Leuven, Leuven, Belgium. <sup>2</sup>Dept CHROMETA, Laboratory of Respiratory Diseases and Thoracic Surgery (BREATHE), KU Leuven, Leuven, Belgium.

Robin Vos ([robin.vos@uzleuven.be](mailto:robin.vos@uzleuven.be))

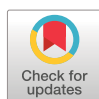

Shareable abstract (@ERSpublications)

**Respiratory tract colonisation with *Pseudomonas aeruginosa* may represent a treatable trait to avert subsequent development of chronic lung allograft dysfunction in lung transplant recipients**  
<https://bit.ly/35rCVhW>

**Cite this article as:** Vos R, Van Herck A. *Pseudomonas aeruginosa* and chronic lung allograft dysfunction: does evading an iceberg prevent the ship from sinking?. *Eur Respir J* 2021; 58: 2100041 [DOI: 10.1183/13993003.00041-2021].

This single-page version can be shared freely online.

Copyright ©The authors 2021. For reproduction rights and permissions contact [permissions@ersnet.org](mailto:permissions@ersnet.org)

Received: 7 Jan 2021  
Accepted: 9 June 2021

*Reply to J. Messika and co-workers:*

Copyright ©The authors 2021. For reproduction rights and permissions contact [permissions@ersnet.org](mailto:permissions@ersnet.org)
